# Supplementary material for: Comparing the 30-Day Mortality for Hip Fractures in Patients with and without COVID-19: An Updated Meta-Analysis
Source: MDPI journal article supplement (doi:10.3390/jpm13040669), 2023-04-15
Supplement: s1 [file s1]

**Supplementary Table S1.** Search strategy (Search on 27 November 2022).

| Database           | Search term                                                                                                                                                                                                                                                                                                                                                                                                                 | n   |
|--------------------|-----------------------------------------------------------------------------------------------------------------------------------------------------------------------------------------------------------------------------------------------------------------------------------------------------------------------------------------------------------------------------------------------------------------------------|-----|
| Medline (via OVID) | exp Coronavirus/ OR COVID-19.ti,ab,kw OR coronavirus.ti,ab,kw. OR SARS-CoV.ti,ab,kw. OR SARS-CoV-2.ti,ab,kw. OR 2019-nCoV.ti,ab,kw. OR exp Severe Acute Respiratory Syndrome/<br>AND<br>exp Hip Fractures/ OR exp Femoral Fractures/ OR hip fracture.ti,ab,kw. OR femoral shaft.ti,ab,kw. OR femur shaft.ti,ab,kw. OR periprosthetic.ti,ab,kw. OR femur neck.ti,ab,kw. OR trochanteric.ti,ab,kw. OR intracapsular.ti,ab,kw. | 271 |
| Embase             | 'coronavirus infection'/exp OR 'coronavirus infection' OR 'covid 19' OR 'coronavirus disease 2019' OR 'severe acute respiratory syndrome coronavirus 2'<br>AND<br>'hip fracture' OR 'femur fracture' OR 'femur shaft fracture' OR 'periprosthetic fracture' OR 'femoral neck fracture' OR 'femur trochanteric fracture' OR intracapsular AND fracture                                                                       | 532 |
| Cochrane library   | Coronavirus[MeSH] OR Severe Acute Respiratory Syndrome[MeSH]<br>COVID-19 OR severe acute respiratory syndrome<br>AND<br>Hip Fractures[MeSH] OR Femoral Fractures[MeSH] OR hip fracture OR femur shaft fracture OR femur neck fracture OR intracapsular fracture                                                                                                                                                             | 17  |
| Total              |                                                                                                                                                                                                                                                                                                                                                                                                                             | 820 |

**Supplementary Table S2.** Quality assessments of individual studies.

| Study                   | Selection                                |                                     |                           |                                                                          | Comparability                                                                              | Outcome / Exposure    |                                                 |                                  | Total |
|-------------------------|------------------------------------------|-------------------------------------|---------------------------|--------------------------------------------------------------------------|--------------------------------------------------------------------------------------------|-----------------------|-------------------------------------------------|----------------------------------|-------|
|                         | Representativeness of the exposed cohort | Selection of the non-exposed cohort | Ascertainment of exposure | Demonstration that outcome of interest was not present at start of study | Comparability of cohorts on the basis of the design or analysis controlled for confounders | Assessment of outcome | Was follow-up long enough for outcomes to occur | Adequacy of follow-up of cohorts |       |
| Ali (2022)              | 1                                        | 1                                   | 1                         | 1                                                                        | 0                                                                                          | 1                     | 0                                               | 0                                | 5     |
| Arafa (2020)            | 1                                        | 1                                   | 1                         | 1                                                                        | 2                                                                                          | 1                     | 0                                               | 0                                | 7     |
| Barker (2021)           | 1                                        | 1                                   | 1                         | 1                                                                        | 0                                                                                          | 1                     | 0                                               | 0                                | 5     |
| Bayrak (2021)           | 1                                        | 1                                   | 1                         | 1                                                                        | 0                                                                                          | 1                     | 0                                               | 0                                | 5     |
| Beaven (2021)           | 1                                        | 1                                   | 1                         | 1                                                                        | 0                                                                                          | 1                     | 0                                               | 0                                | 5     |
| Biarnes-Sune (2021)     | 1                                        | 1                                   | 1                         | 1                                                                        | 0                                                                                          | 1                     | 0                                               | 0                                | 5     |
| Chan (2022)             | 1                                        | 1                                   | 1                         | 1                                                                        | 0                                                                                          | 1                     | 0                                               | 0                                | 5     |
| Chui (2020)             | 1                                        | 1                                   | 1                         | 1                                                                        | 2                                                                                          | 1                     | 0                                               | 0                                | 7     |
| Clement (2020)          | 1                                        | 1                                   | 1                         | 1                                                                        | 0                                                                                          | 1                     | 0                                               | 0                                | 5     |
| Clough (2020)           | 1                                        | 1                                   | 1                         | 1                                                                        | 0                                                                                          | 1                     | 0                                               | 0                                | 5     |
| Cuthbert (2021)         | 1                                        | 1                                   | 1                         | 1                                                                        | 2                                                                                          | 1                     | 0                                               | 0                                | 7     |
| Dallari (2021)          | 1                                        | 1                                   | 1                         | 1                                                                        | 0                                                                                          | 1                     | 0                                               | 0                                | 5     |
| De (2021)               | 1                                        | 1                                   | 1                         | 1                                                                        | 0                                                                                          | 1                     | 0                                               | 0                                | 5     |
| Egol (2020)             | 1                                        | 1                                   | 1                         | 1                                                                        | 2                                                                                          | 1                     | 0                                               | 0                                | 7     |
| Fadulelmola (2021)      | 1                                        | 1                                   | 1                         | 1                                                                        | 0                                                                                          | 1                     | 0                                               | 0                                | 5     |
| Fell (2021)             | 1                                        | 1                                   | 1                         | 1                                                                        | 0                                                                                          | 1                     | 0                                               | 0                                | 5     |
| Hall (2020)             | 1                                        | 1                                   | 1                         | 1                                                                        | 0                                                                                          | 1                     | 0                                               | 0                                | 5     |
| Hall (2022)             | 1                                        | 1                                   | 1                         | 1                                                                        | 2                                                                                          | 1                     | 0                                               | 0                                | 7     |
| Jimenez-Telleria (2020) | 1                                        | 1                                   | 1                         | 1                                                                        | 2                                                                                          | 1                     | 0                                               | 0                                | 7     |
| Karayiannis             | 1                                        | 1                                   | 1                         | 1                                                                        | 0                                                                                          | 1                     | 0                                               | 0                                | 5     |

|                              |   |   |   |   |   |   |   |   |   |
|------------------------------|---|---|---|---|---|---|---|---|---|
| (2020)                       |   |   |   |   |   |   |   |   |   |
| Kayani<br>(2020)             | 1 | 1 | 1 | 1 | 2 | 1 | 0 | 0 | 7 |
| LeBrun<br>(2020)             | 1 | 1 | 1 | 1 | 2 | 1 | 0 | 0 | 7 |
| Levitt<br>(2022)             | 1 | 1 | 1 | 1 | 2 | 1 | 0 | 0 | 7 |
| Lim (2021)                   | 1 | 1 | 1 | 1 | 0 | 1 | 0 | 0 | 5 |
| Macey<br>(2020)              | 1 | 1 | 1 | 1 | 0 | 1 | 0 | 0 | 5 |
| Malik-<br>Tabassum<br>(2020) | 1 | 1 | 1 | 1 | 0 | 1 | 0 | 0 | 5 |
| Malik-<br>Tabassum<br>(2021) | 1 | 1 | 1 | 1 | 0 | 1 | 0 | 0 | 5 |
| Mamrelis<br>(2020)           | 1 | 1 | 1 | 1 | 0 | 1 | 0 | 0 | 5 |
| Maniscalco<br>(2020)         | 1 | 1 | 1 | 1 | 0 | 1 | 0 | 0 | 5 |
| Munoz<br>(2020)              | 1 | 1 | 1 | 1 | 0 | 1 | 0 | 0 | 5 |
| Narang<br>(2021)             | 1 | 1 | 1 | 1 | 2 | 1 | 0 | 0 | 7 |
| Oputa<br>(2021)              | 1 | 1 | 1 | 1 | 0 | 1 | 0 | 0 | 5 |
| Rashid<br>(2022)             | 1 | 1 | 1 | 1 | 2 | 1 | 0 | 0 | 7 |
| Segarra<br>(2020)            | 1 | 1 | 1 | 1 | 0 | 1 | 0 | 0 | 5 |
| Sobti (2020)                 | 1 | 1 | 1 | 1 | 2 | 1 | 0 | 0 | 7 |
| Thakrar<br>(2020)            | 1 | 1 | 1 | 1 | 2 | 1 | 0 | 0 | 7 |
| Vialonga<br>(2020)           | 1 | 1 | 1 | 1 | 2 | 1 | 0 | 0 | 7 |
| Vives<br>(2020)              | 1 | 1 | 1 | 1 | 0 | 1 | 0 | 0 | 5 |
| Walters<br>(2022)            | 1 | 1 | 1 | 1 | 0 | 1 | 0 | 0 | 5 |
| Wignall<br>(2021)            | 1 | 1 | 1 | 1 | 0 | 1 | 0 | 0 | 5 |

|                  |   |   |   |   |   |   |   |   |   |
|------------------|---|---|---|---|---|---|---|---|---|
| Wright<br>(2021) | 1 | 1 | 1 | 1 | 2 | 1 | 0 | 0 | 7 |
| Zamora<br>(2021) | 1 | 1 | 1 | 1 | 0 | 1 | 0 | 0 | 5 |

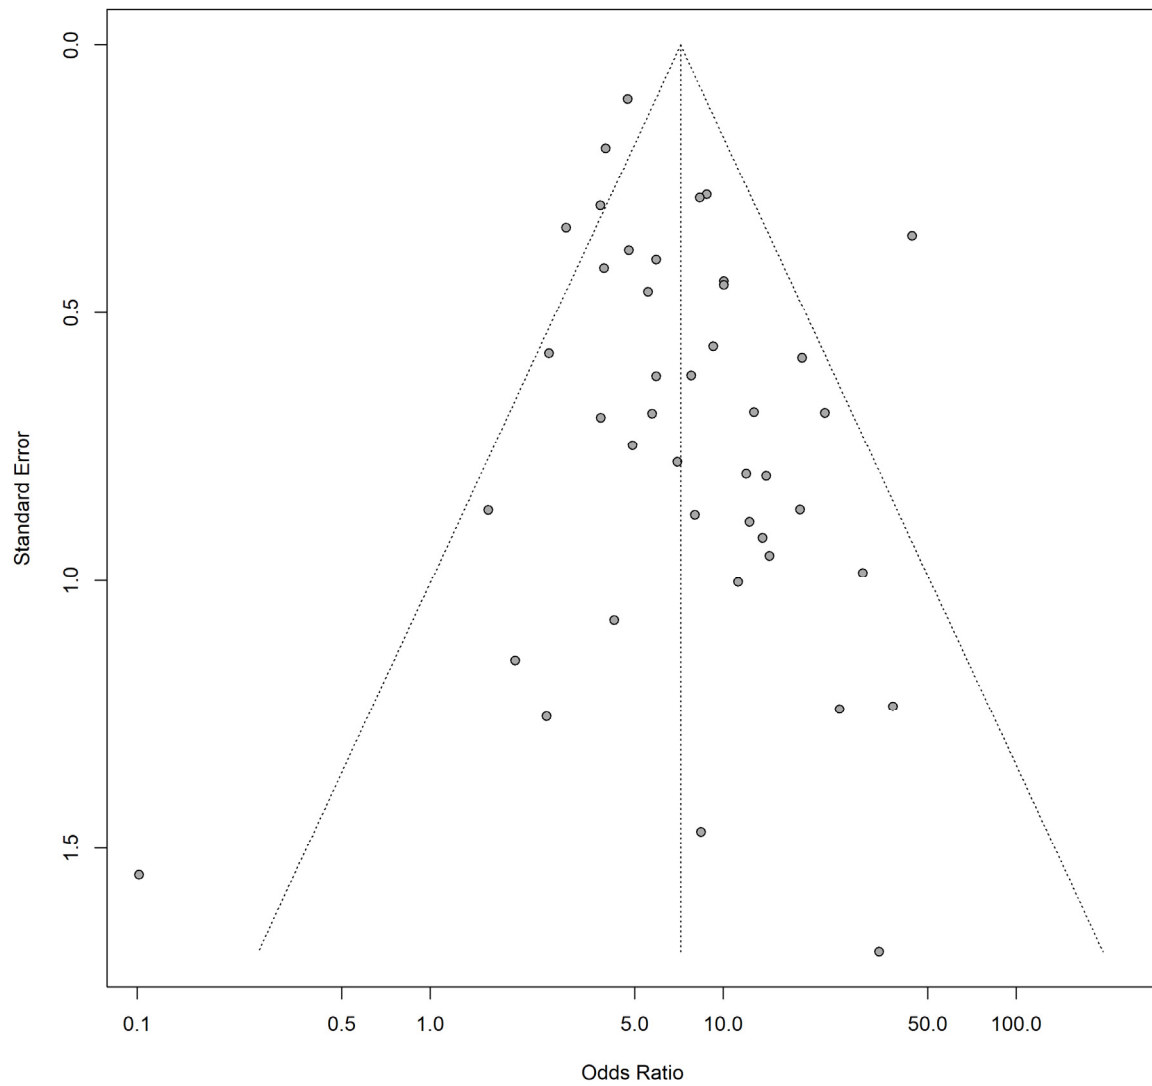

**Supplementary Figure S1.** Funnel plot for assessment of publication bias.
